# Supplementary material for: An analysis of tissue-specific alternative splicing at the protein level
Source: PubMed Central journal article supplement (PMC7561204; doi:10.1371/journal.pcbi.1008287), 2020-10-05
Supplement: pcbi.1008287.s002.pdf [file pcbi.1008287.s002.pdf]

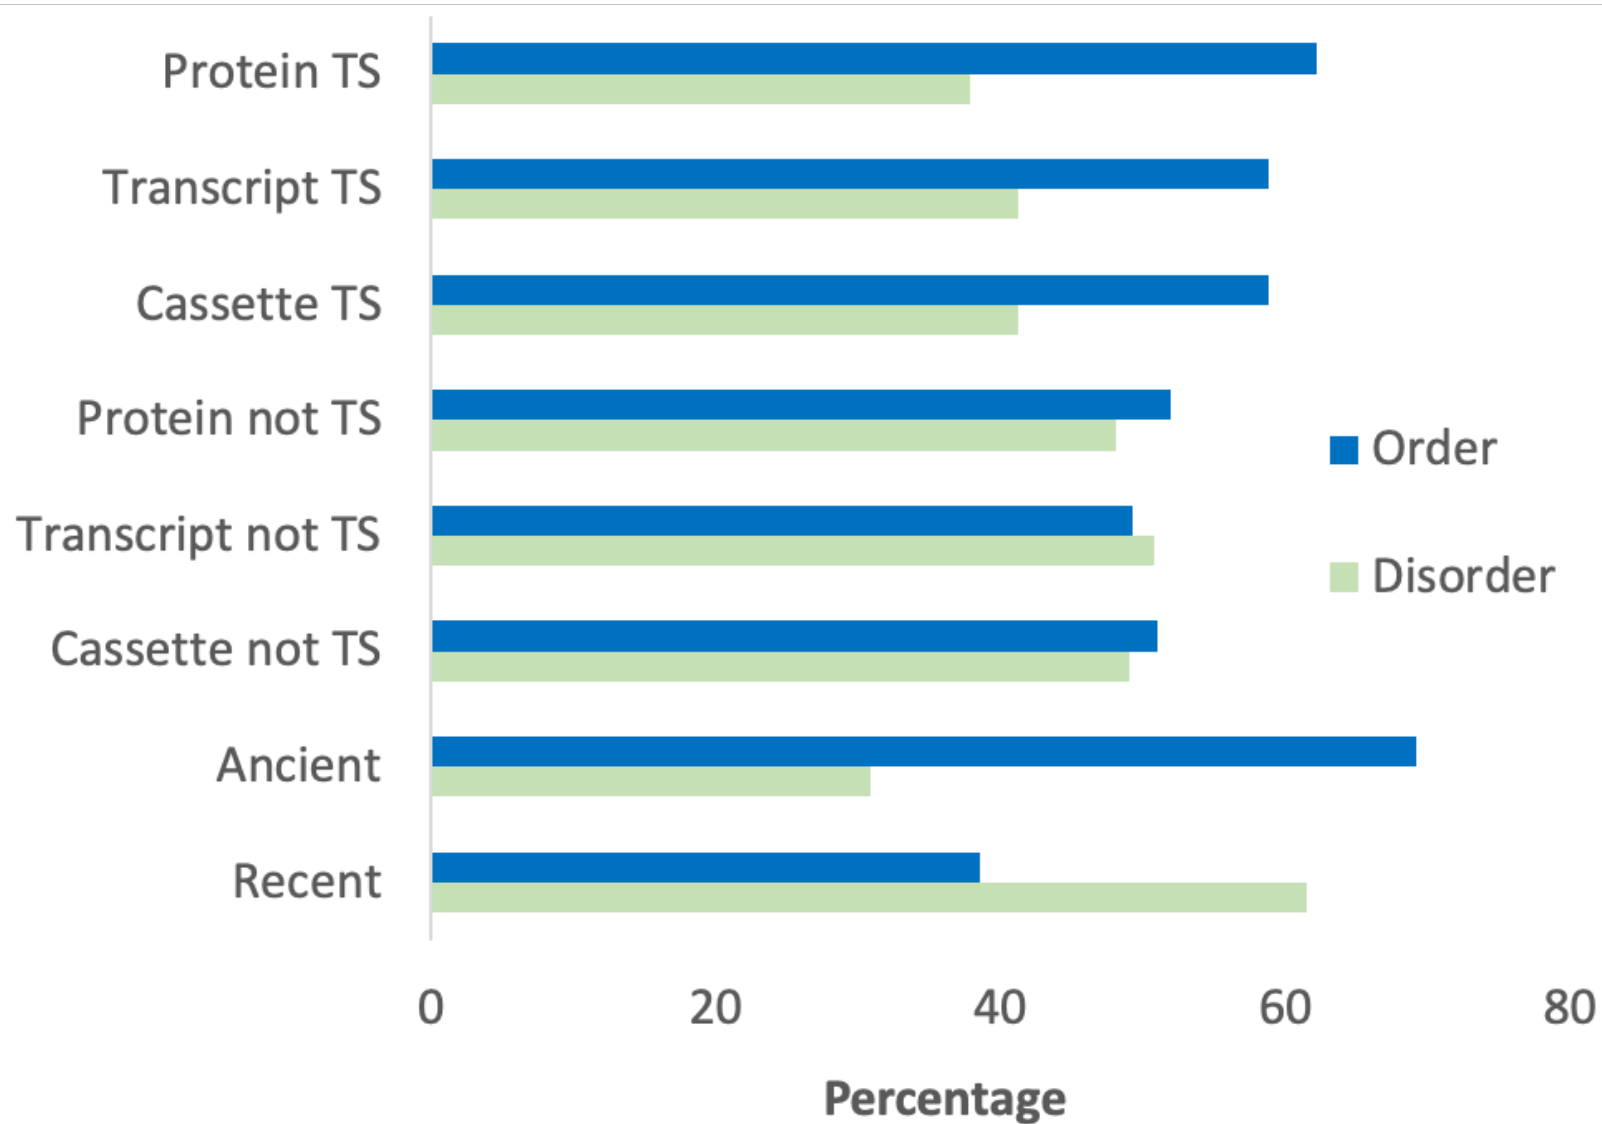

**S2 Figure. Predicted order and disorder.**

Mean order and disorder predicted by IUPred for various subsets. *Protein TS* are those events that are tissue specific at the protein level. *Transcript TS* are those events that are tissue specific at the transcript level. *Cassette TS* are skipped exon events that are tissue specific at the protein level. *Protein Not* are those events that are not tissue specific at the protein level. *Transcript Not* are those events that are not tissue specific at the transcript level. *Cassette Not* are skipped exon events that are not tissue specific at the protein level. *Ancient* are those events that manual curation has shown to evolve more than 400 million years ago. *Recent* are all other events.
