# Supplementary material for: An analysis of tissue-specific alternative splicing at the protein level
Source: PubMed Central journal article supplement (PMC7561204; doi:10.1371/journal.pcbi.1008287), 2020-10-05
Supplement: pcbi.1008287.s003.pdf [file pcbi.1008287.s003.pdf]

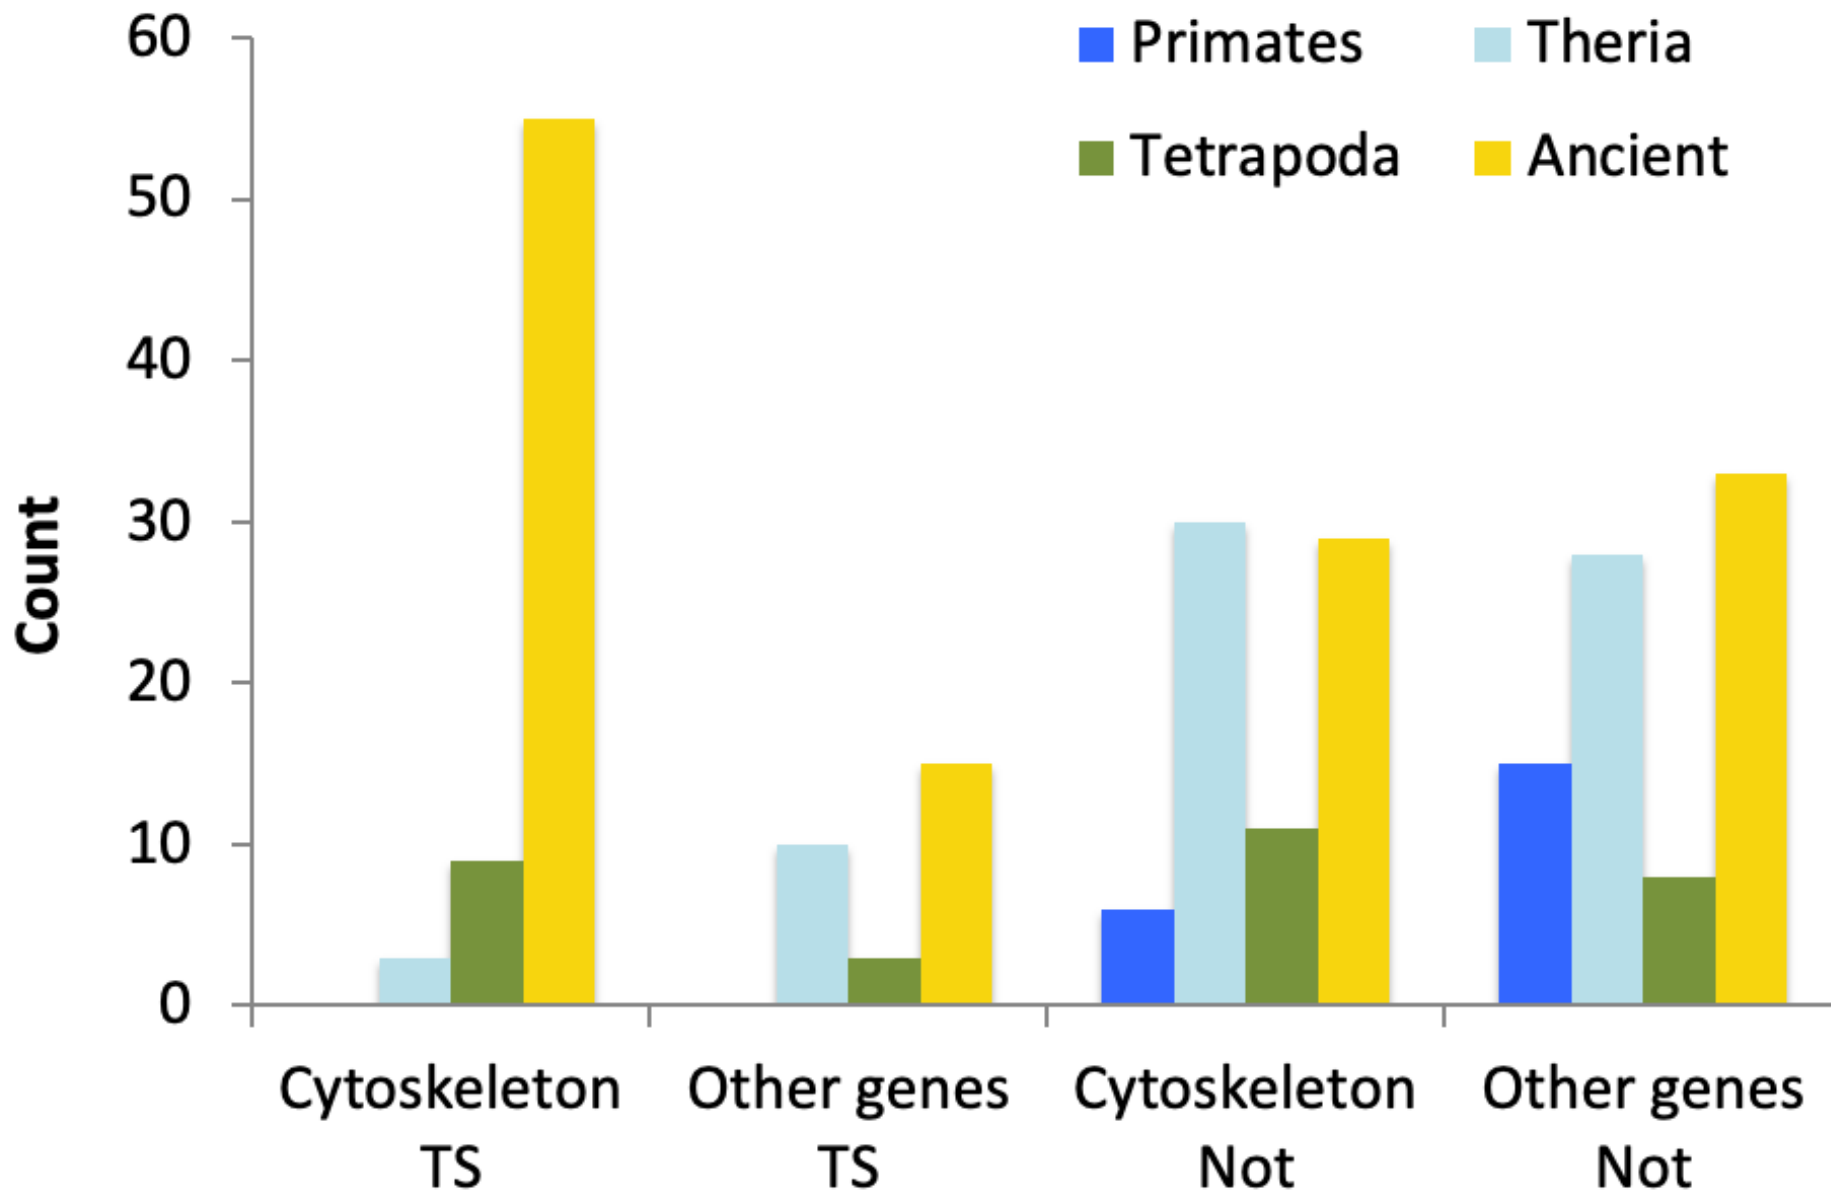

**S3 Figure. The relative ages of splice events in cytoskeleton-related genes.** The number of events with evidence in four different clades (vertebra to primates) separated into four groups by whether or not they were present in cytoskeleton-related genes (“Cytoskeleton” and “Other genes”), and whether or not the event was found to be significantly tissue specific at the protein level (“TS” or “Not”). There was a significantly higher proportion of vertebrate-derived events among the tissue specific events in cytoskeleton-related genes (Fisher’s exact tests: 0.0093 vs Other genes TS).
