# Supplementary material for: An analysis of tissue-specific alternative splicing at the protein level
Source: PLOS journal article supplement (doi:10.1371/journal.pcbi.1008287), 2020-10-05
Supplement: S1 (10.1371/journal.pcbi.1008287.s001) [file journal.pcbi.1008287.s001]

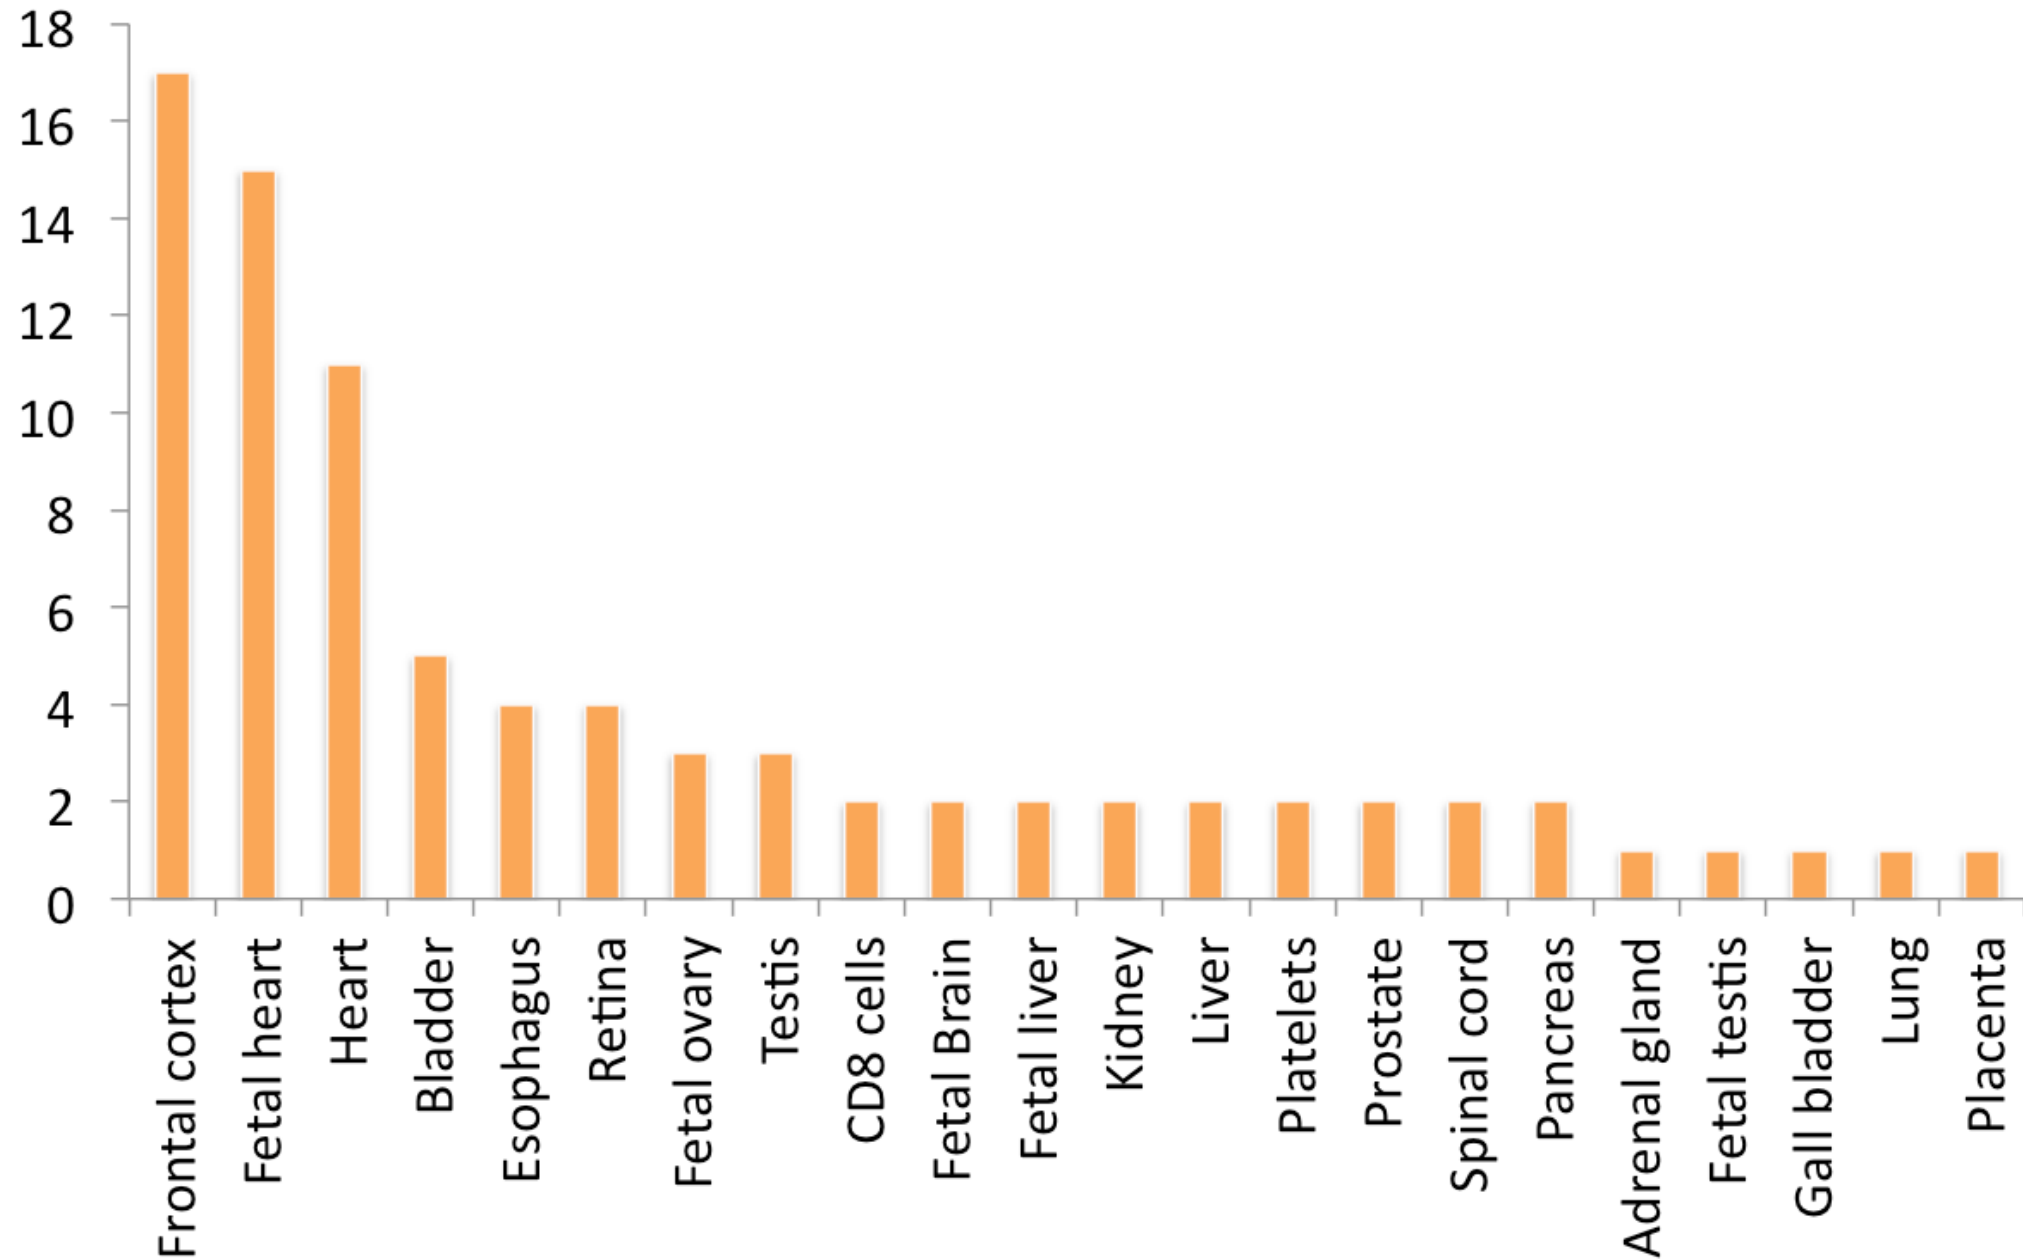

**S1 Figure. Significant tissue specific alternative splicing cases in proteomics tissues.** The count of the number of times we recorded tissue specific differences at the protein level in each of the 30 tissues.
